# Supplementary material
Source: PubMed Central journal article supplement (PMC4719302)
Supplement: MCB.00832-15_zmb999101091so1.pdf [file MCB.00832-15_zmb999101091so1.pdf]

# Supplementary Figures

## S1

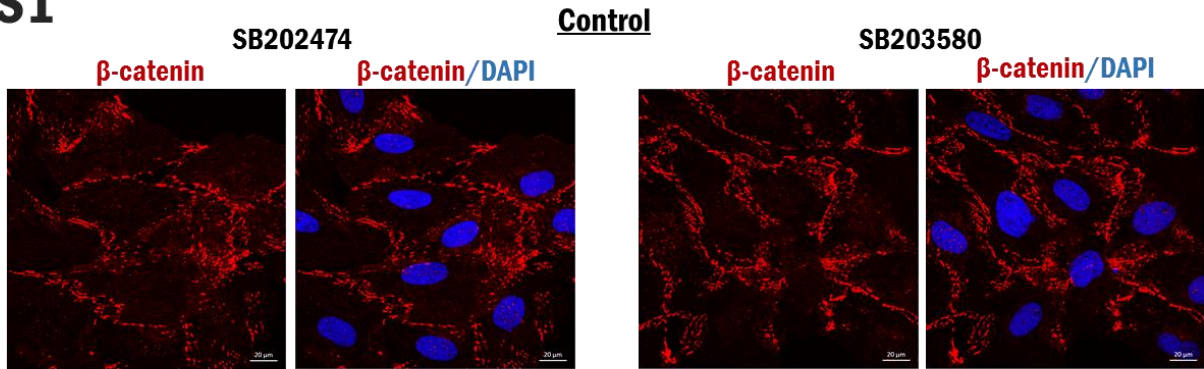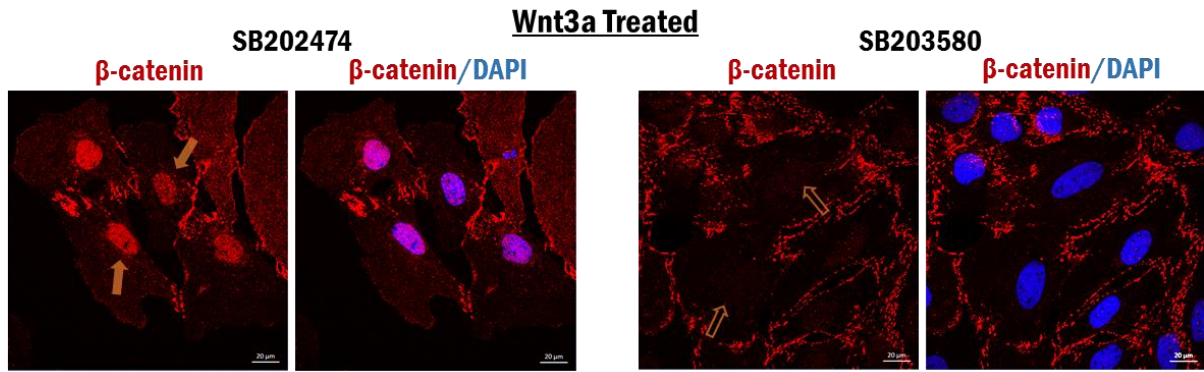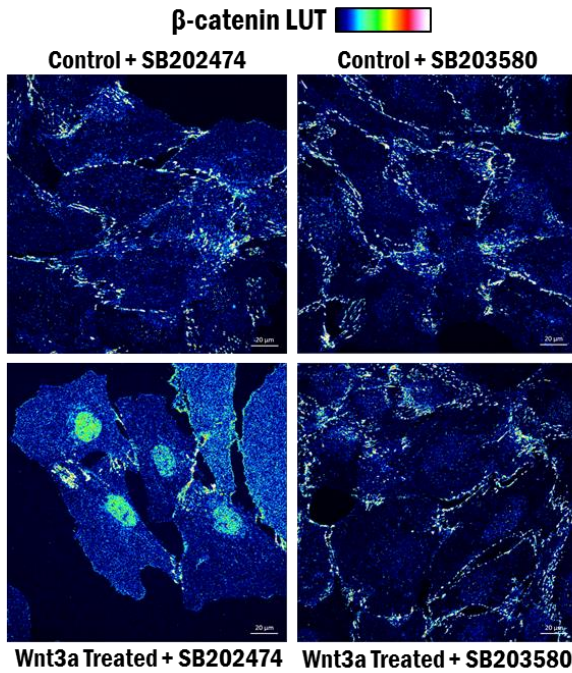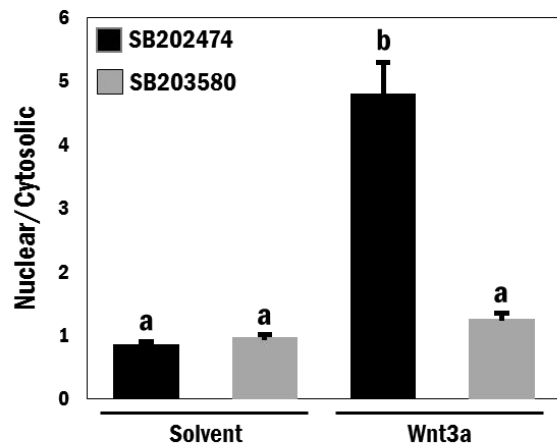

1 **S1. Modulation of  $\beta$ -catenin localization with Wnt3a stimulation and p38 MAPK inhibition.**

2 A10 cells were serum starved for 12 hr and pre-treated with SB203580 or SB202474 (10  $\mu$ M, 45  
3 min) then stimulated with Wnt3a (200 ng/mL) or solvent (PBS, control) for 4 hr. Cells were  
4 fixed and stained with DAPI (blue, nucleus) and TRITC (red,  $\beta$ -catenin). Filled arrows indicate  
5 presence of nuclear  $\beta$ -catenin, empty arrows indicate lack thereof. (Bottom left panel) A rainbow  
6 (blue to red) lookup table (LUT) was used to indicate relative  $\beta$ -catenin intensity. (Bottom right  
7 panel) Relative nuclear to cytosolic fluorescence levels were measured and quantified (n=28, 25,  
8 21, 27 from left to right);  $b=p \leq 0.0001$ .

**S2**

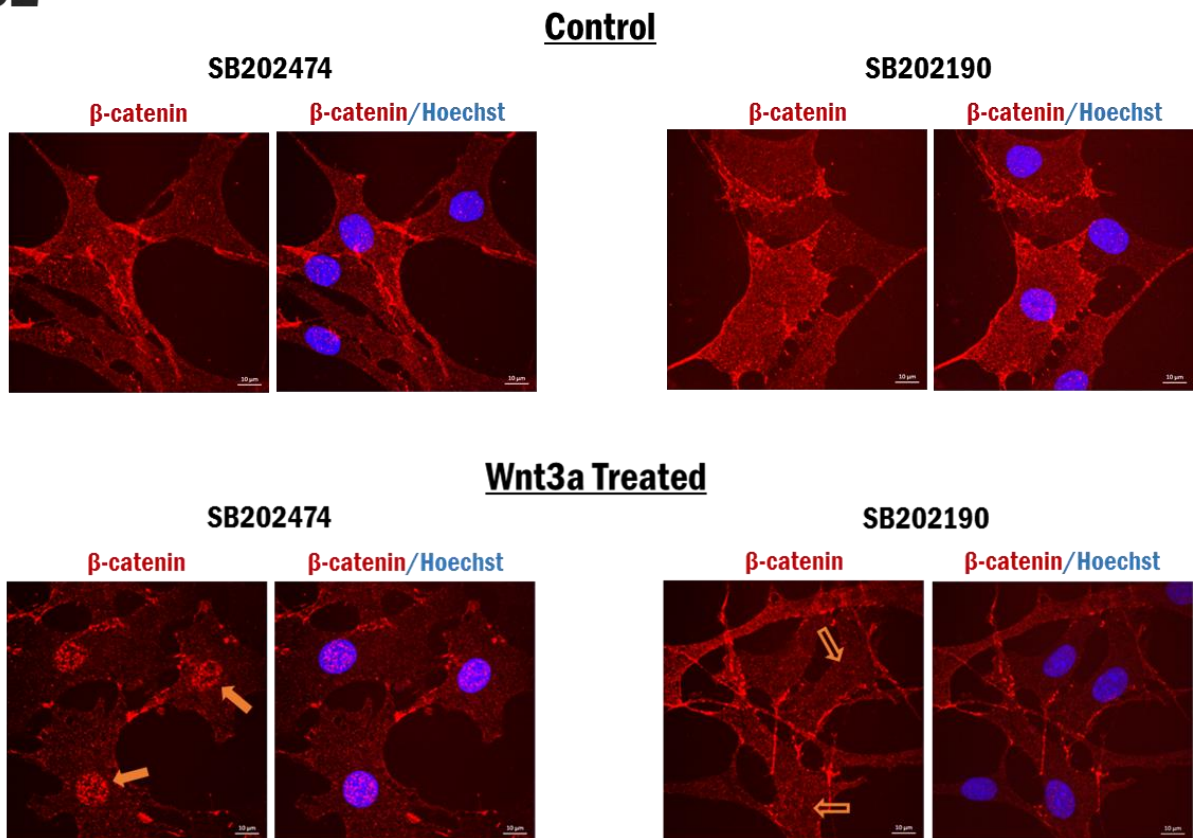

9 **S2. Modulation of  $\beta$ -catenin localization with Wnt3a stimulation and p38 MAPK inhibition.**

10 Primary VSMCs were serum starved for 12 hr and pre-treated with SB202190 or SB202474 (10

11  $\mu\text{M}$ , 45 min) then stimulated with Wnt3a (200 ng/mL) or solvent (PBS, control) for 4 hr. Cells  
12 were fixed and stained with DAPI (blue, nucleus) and TRITC (red,  $\beta$ -catenin). Filled arrows  
13 indicate presence of nuclear  $\beta$ -catenin, empty arrows indicate lack thereof.

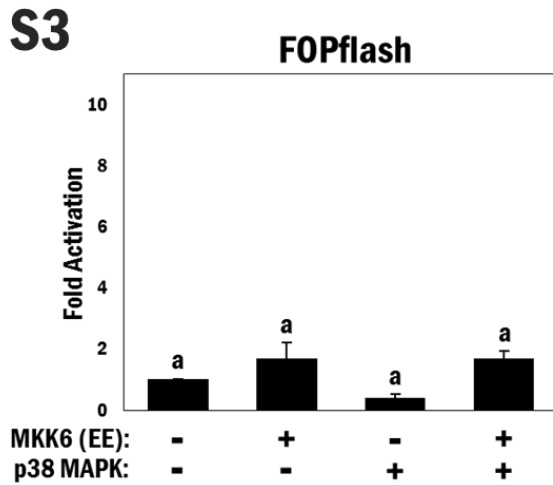

14 **S3. FOPflash reporter gene activity in response to active p38 MAPK signalling.** FOPflash  
15 reporter gene activity was measured in A10 cells that were transfected with different  
16 combinations of p38 MAPK and active MKK6 (EE) as indicated.

# S4

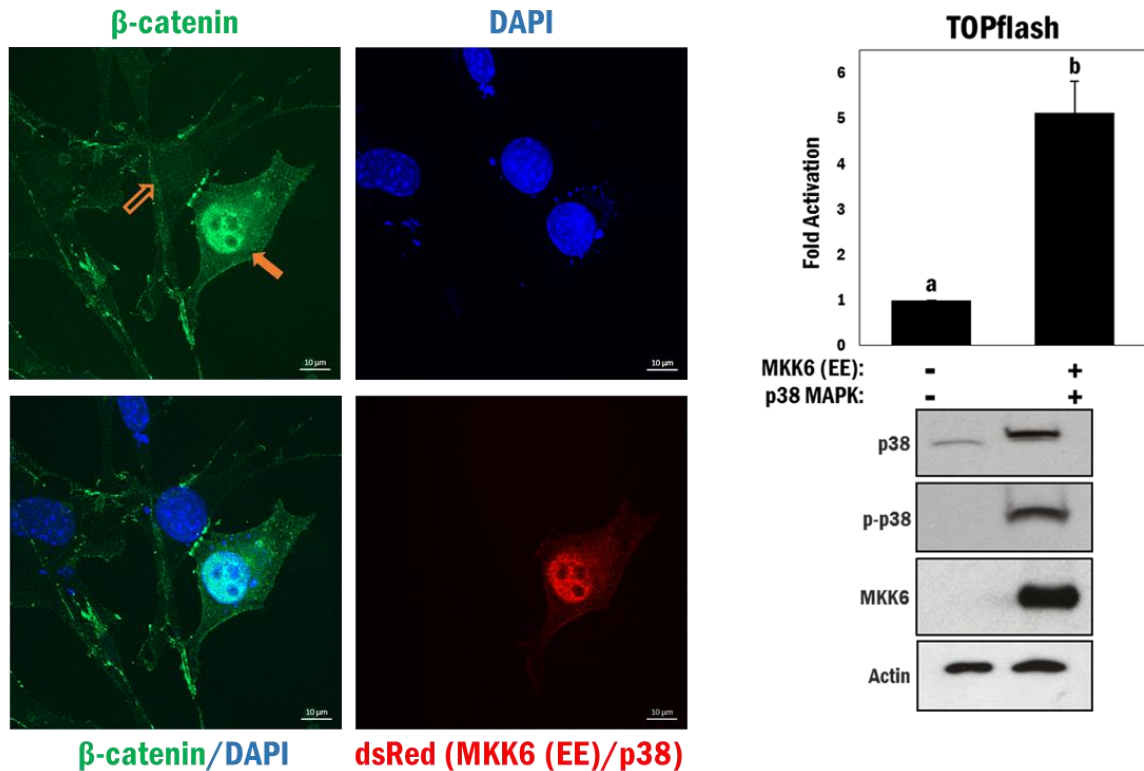

17 **S4. β-catenin localization and transactivation in response to active p38 MAPK.** (Left panel)  
 18 10T1/2 cells were co-transfected with MKK6 (EE) and p38 MAPK and marked for ectopic  
 19 expression (dsRed, red), DAPI was used for nuclear staining and FITC was used for β-catenin  
 20 staining (green); (Top right panel) TOPflash reporter gene activity was measured in 10T1/2 cells  
 21 that were transfected with different combinations of p38 MAPK and active MKK6 (EE) as  
 22 indicated; b=p≤0.05. (Bottom right panel) Western blot analysis to show activation of p38 MAPK.

**S5**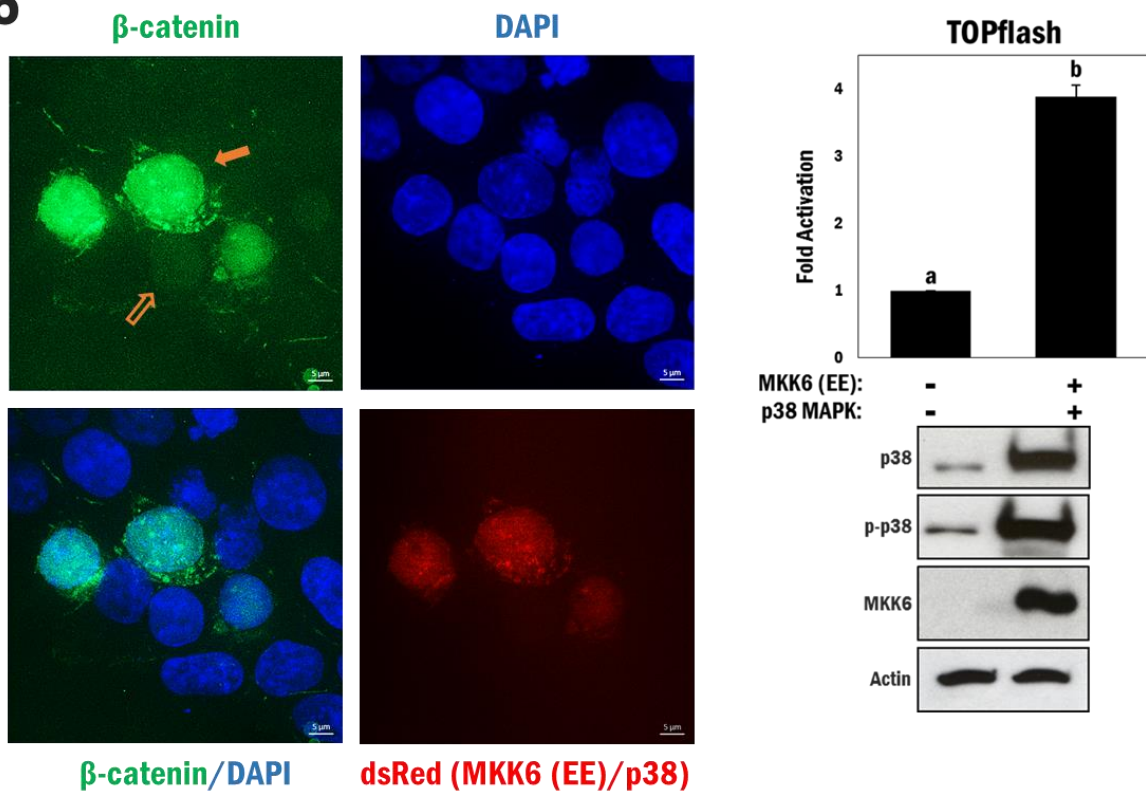

23 **S5. β-catenin localization and *transactivation* in response to active p38 MAPK.** (Left panel)

24 HEK 293T cells were co-transfected with MKK6 (EE) and p38 MAPK and marked for ectopic

25 expression (dsRed, red), DAPI was used for nuclear staining and FITC was used for β-catenin

26 staining (green); (Top right panel) TOPflash reporter gene activity was measured in HEK 293T

27 cells that were transfected with different combinations of p38 MAPK and active MKK6 (EE) as

28 indicated; b=p≤0.01. (Bottom right panel) Western blot analysis to show activation of p38 MAPK.

# S6

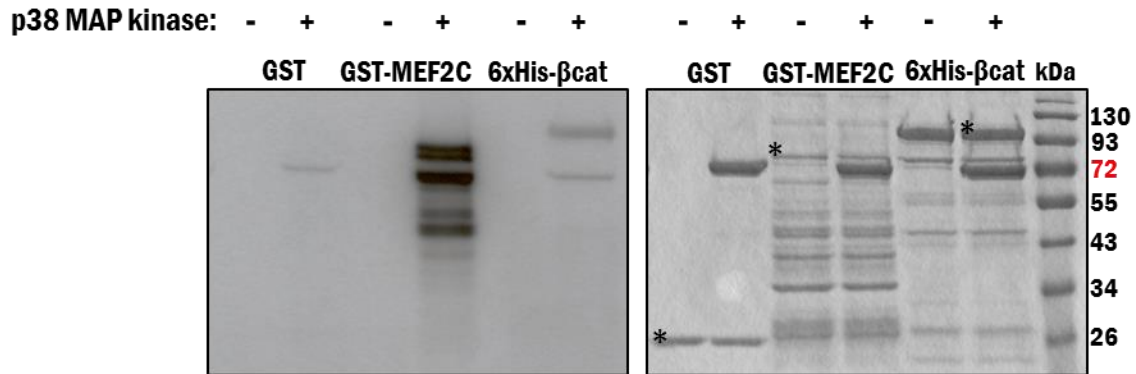

29 **S6. Determination of  $\beta$ -catenin as a potential substrate of p38 MAPK by *in vitro* kinase assay.**  
30 Purified p38 MAPK was incubated with [ $\gamma$ - $^{32}$ P]ATP, and either GST (negative control), GST-  
31 MEF2C (positive control), or 6xHis- $\beta$ -catenin, as indicated, for 30 min at 30°C. The subsequent  
32 SDS-PAGE was exposed to X-ray film to determine  $^{32}$ P incorporation. Stars indicate location of  
33 substrate proteins.



# S7

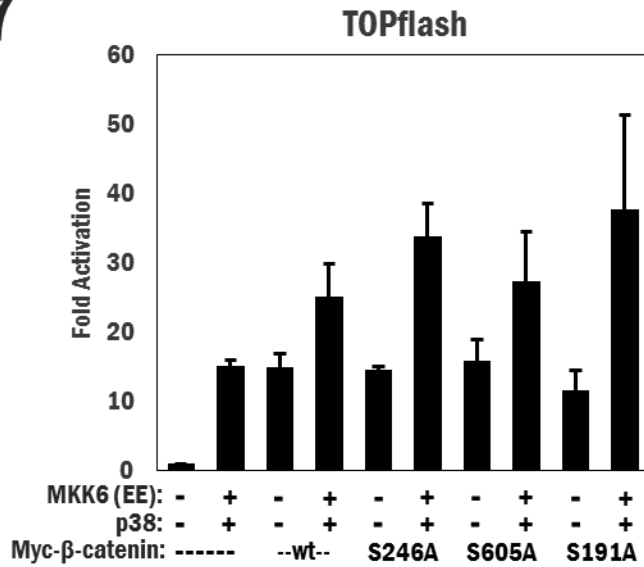

34 **S7. Mutational analysis of  $\beta$ -catenin transactivation properties following Ser to Ala**  
35 **mutations of putative MAPK phospho-sites in response to p38 MAPK signalling.** Wild-type  
36 or mutated Myc-tagged  $\beta$ -catenin was over-expressed with MKK6 (EE) and p38 MAPK in a  
37 TOPflash reporter assay, as indicated.

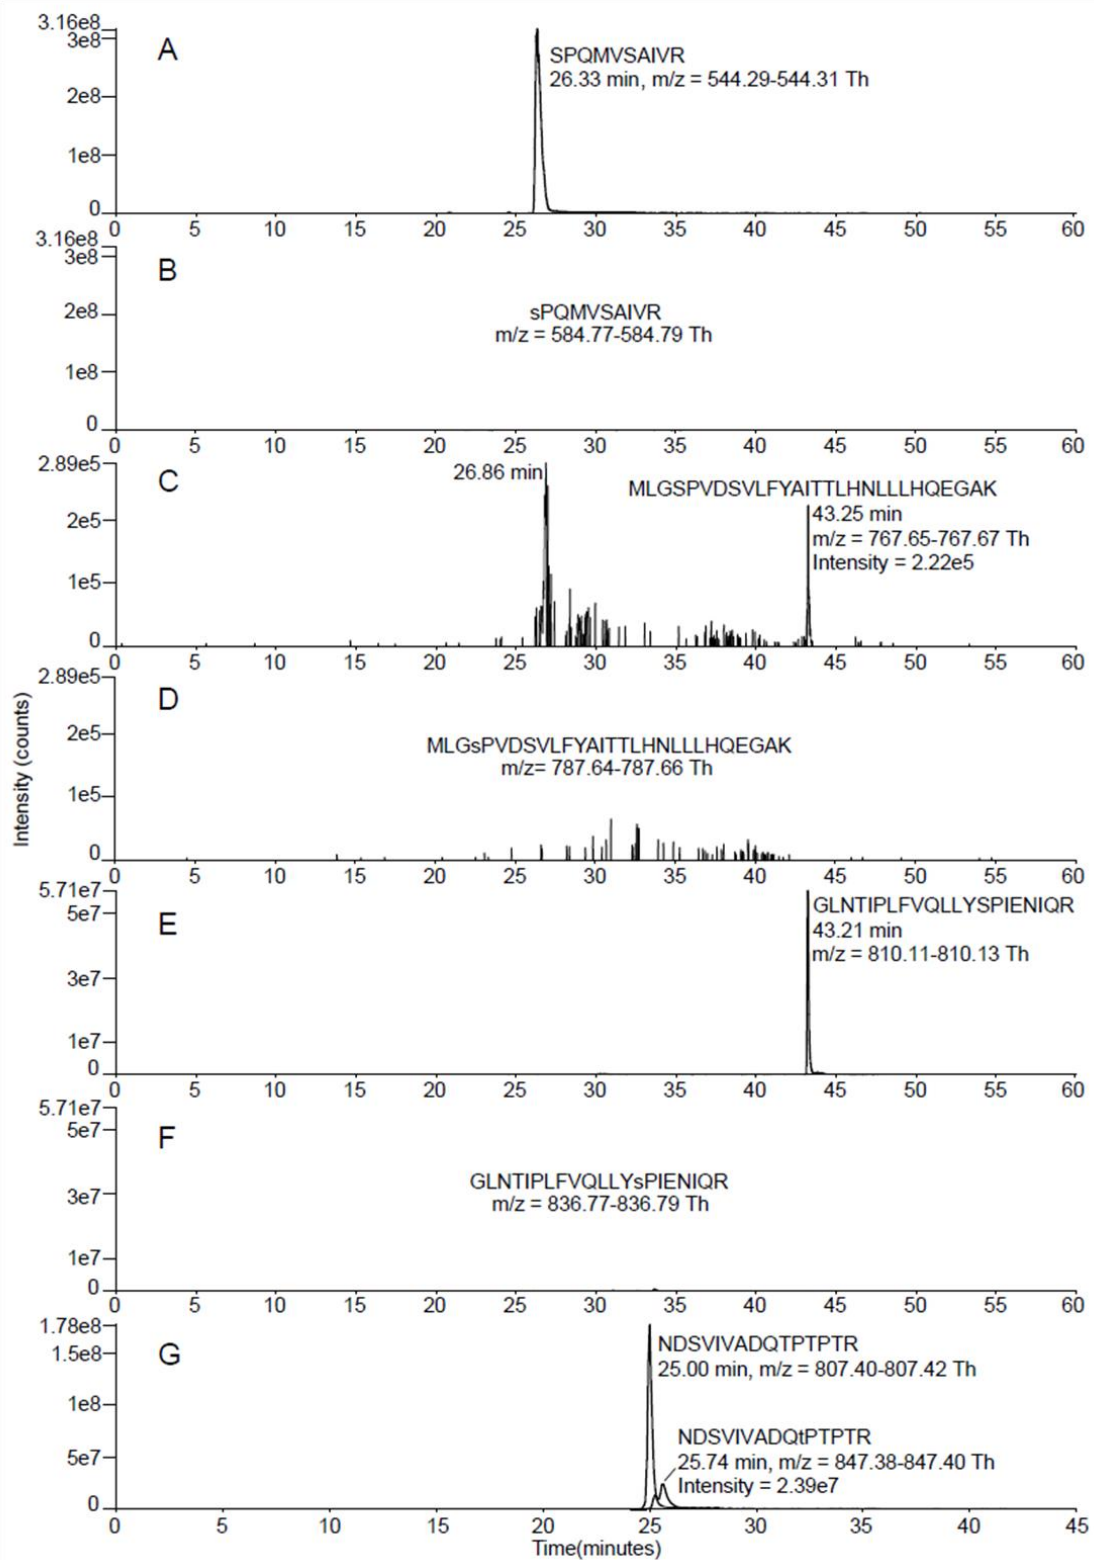



38 **S8. Ion chromatograms of tryptic  $\beta$ -catenin peptides containing candidate p38 MAPK**  
39 **phosphosites and a tryptic ATF2 peptide and phosphopeptide containing known p38**  
40 **MAPK phosphosites.** Phosphorylated residues are shown as lower case letters. Doubly  
41 protonated SPQMVSAIVR (A) from  $\beta$ -catenin gave a prominent chromatographic peak while  
42 the corresponding phosphopeptide (B) did not. The quadruply protonated peptide  
43 MLGSPVDSVLFYAITTLHNLLLHQEGAK (C) was confirmed by MS/MS at 43.25 minutes  
44 while the ion at 26.86 minutes was an isobaric species. No chromatographic peak from  
45 phosphorylated MLGSPVDSVLFYAITTLHNLLLHQEGAK was present (D). Doubly  
46 protonated GLNTIPLFVQLLYSPIENIQR (E) was observed at 43.21 minutes while the  
47 extracted ion chromatogram of the phosphorylated counterpart (F) had no signal. The ATF2  
48 peptide NDSVIVADQTPTPTR is shown in both its unmodified and phosphorylated state in  
49 panel G.

# S9

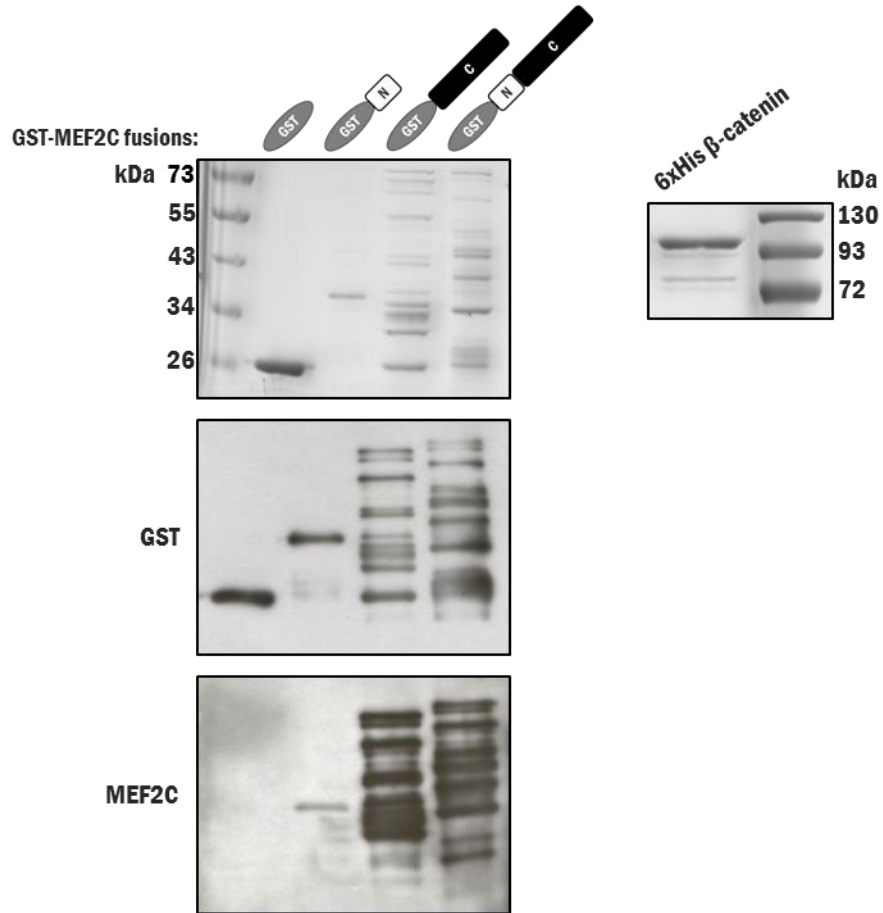

50 **S9. Purification of GST-MEF2C and 6xHis-β-catenin.** GST-MEF2C or 6xHis-β-catenin  
51 fusion proteins were purified from *E. coli* using GST-agarose or Nickel-agarose columns,  
52 respectively. Representative Coomassie blue SDS-PAGE and Western blots are shown to  
53 confirm purification.

## S10

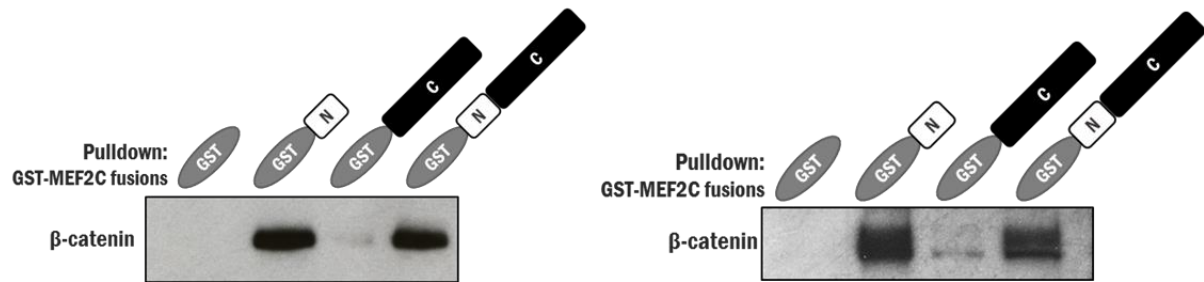

54 **S10. *In vitro* binding assay.** An *in vitro* GST pull down assay was performed using purified 6x-  
55 His- $\beta$ -catenin and either GST (control), the N-terminal (aa 1-86), C-terminal (aa 87-465), or full  
56 length (aa 1-465) GST-MEF2C fusion proteins.

## S11

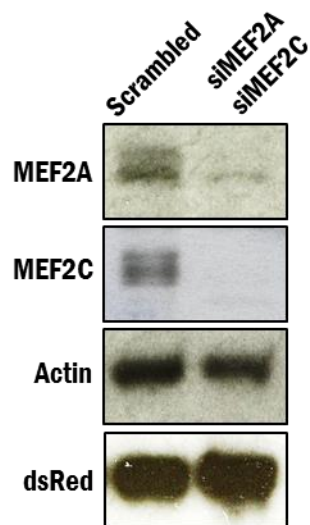

57 **S11. Confirmation of siRNA mediated silencing of MEF2A/C.** A10 cells were transfected  
58 with either scrambled RNA control or siRNA for MEF2A and MEF2C, and confirmed by  
59 Western analysis.

# S12

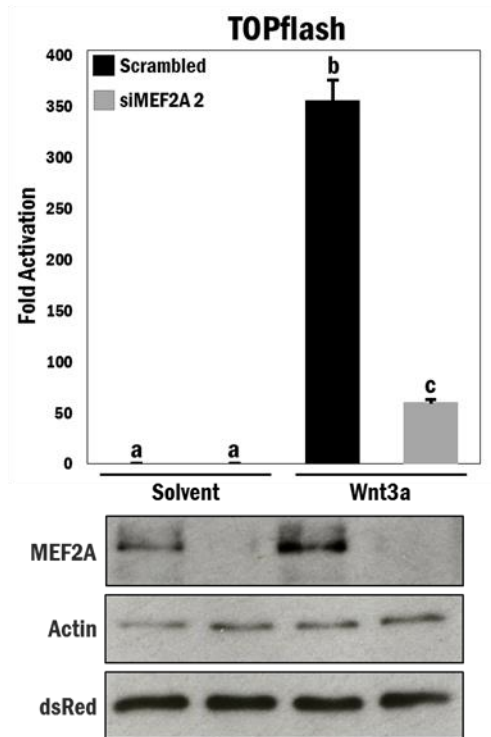

60 **S12. TOPflash assay during Wnt stimulation using siRNA to MEF2A.** (Top panel) A10 cells  
61 were transfected with TOPflash reporter, scrambled or siMEF2A RNA for 3 hr, cultured in serum  
62 conditions for 24 hr followed by treatment with either Wnt3a (200 ng/mL) or solvent (PBS) for  
63 16 hr in serum free media; b,c=p≤0.0001. (Bottom panel) Corresponding Western blot analysis  
64 of cell lysates to confirm siRNA-mediated MEF2A depletion.

# S13

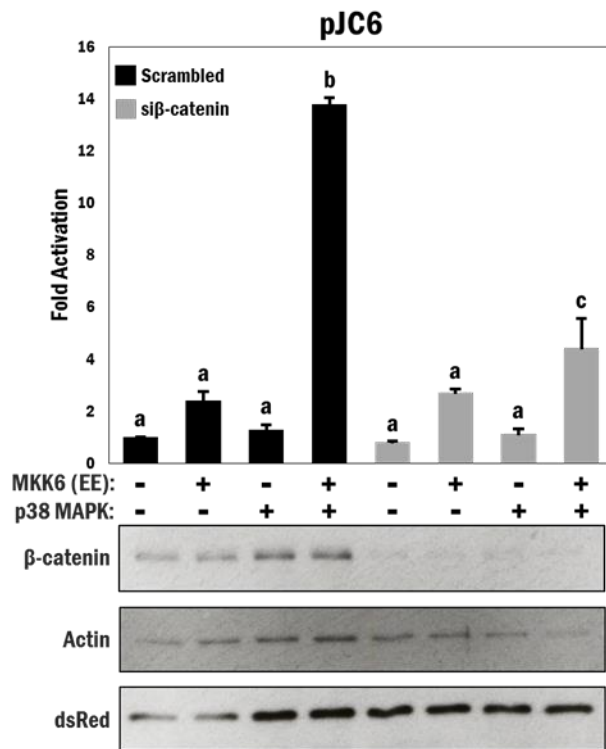

65 **S13. c-Jun reporter assay with active p38 MAPK and β-catenin gene silencing.** c-Jun  
66 reporter gene (pJC6) activity was measured in A10 cells under various combinations of  
67 ectopically expressed MKK6 (EE) and p38 MAPK, and either scrambled RNA (control) or  
68 siRNA β-catenin, as indicated in the figure; b,c=p≤0.0001.

# S14

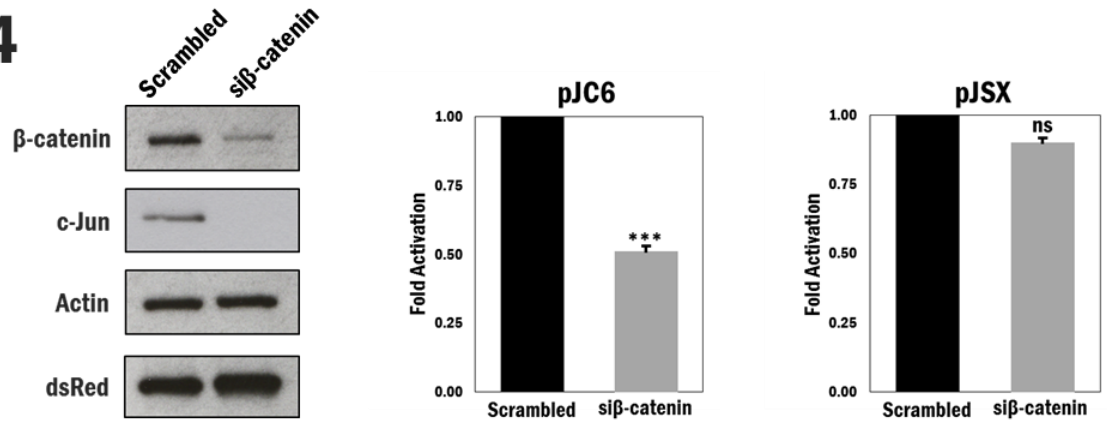

69 **S14.** Western blot analysis of A10 cells that have been transfected with scrambled shRNA  
70 (control) or shRNA β-catenin with comparative pJC6 and pJSX reporter activities; \*\*\*= $p \leq 0.001$ .
